# Supplementary material
Source: bioRxiv or medRxiv preprint supplement (https://www.biorxiv.org/highwire/filestream/130491/field_highwire_adjunct_files/4/434654-2.pdf)
Supplement: Supplementary file [file 434654-2.pdf]

1 **Table S1.** Effects of warming and precipitation treatments (fixed effects) on soil temperature  
 2 in the summer and the fall, using a mixed-effects model that included the fixed effect of time  
 3 and the random effect of blocks. P values for Type III sum of squares with a Satterthwaite  
 4 approximation for the degrees of freedom. Significance codes: P < 0.001 '\*\*\*', 0.05 < P < 0.1  
 5 '†'.

|               | <b>Sum. Sq.</b> | <b>Mean Sq.</b> | <b>num df</b> | <b>den df</b> | <b>F</b> | <b>P</b>   |
|---------------|-----------------|-----------------|---------------|---------------|----------|------------|
| Precip        | 34.0            | 17.0            | 2             | 69            | 16.6     | < 0.001*** |
| Temp          | 70.7            | 23.6            | 3             | 69            | 23.0     | < 0.001*** |
| Season        | 657.8           | 657.8           | 1             | 69            | 640.6    | < 0.001*** |
| Precip:Temp   | 3.4             | 0.6             | 6             | 69            | 0.6      | 0.768      |
| Precip:Season | 5.9             | 3.0             | 2             | 69            | 2.9      | 0.064 †    |
| Temp:Season   | 0.2             | 0.1             | 3             | 69            | 0.1      | 0.981      |

6
